# Supplementary material for: Improving oral health through dental fluoride varnish application in a primary care paediatric practice
Source: PubMed Central journal article supplement — BMJ Open Qual. 2019 May 31;8(2):e000589. doi: 10.1136/bmjoq-2018-000589 (PMC6567938; doi:10.1136/bmjoq-2018-000589), 2019-05-31
Supplement: bmjoq-2018-000589supp001.pdf [file bmjoq-2018-000589supp001.pdf]

## **Clinic Flow Protocol for Fluoride Varnish**

Age: 6 months- 3 years

Visit: Well Child visit

Frequency: every 3-6 months

### **Clinic Flow**

Clinic front desk identifies the correct age for the well child visits

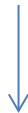

6 months – 3 years of age

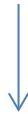

Medical Assistants or nurses administer the oral health questionnaire to the patient, collect, and document them in the chart.

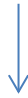

Health care providers review the oral health questionnaire, discuss good practices and if no dental home is identified, recommends oral fluoride varnish

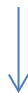

If patient family consents, the physician directs the clinic staff for administration of the fluoride varnish to the child.

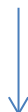

If a dental home is identified or no teeth yet, it is documented in the charts.
